# Supplementary material for: Organocatalytic synthesis of poly(hydroxymethylfuroate) via ring-opening polymerization of 5-hydroxymethylfurfural-based cyclic oligoesters
Source: Royal Society of Chemistry journal article supplement (doi:10.1039/d1py01687c), 2022-01-01

## **Organocatalytic Synthesis of Poly(hydroxymethylfuroate) via Ring-Opening Polymerization of 5-Hydroxymethylfurfural-Based Cyclic Oligoesters**

Daniele Ragno,\*<sup>a</sup> Graziano Di Carmine,<sup>a</sup> Micaela Vannini,<sup>b</sup> Olga Bortolini,<sup>c</sup> Daniela Perrone,<sup>c</sup> Sara Buoso,<sup>d</sup> Monica Bertoldo,<sup>a</sup> and Alessandro Massi\*<sup>a</sup>

<sup>a</sup>*Department of Chemical, Pharmaceutical and Agricultural Sciences, University of Ferrara, Via L. Borsari, 46, 44121 Ferrara (Italy)*

<sup>b</sup>*Department of Civil, Chemical, Environmental, and Materials Engineering, Via Terracini 38, University of Bologna, 40131 Bologna (Italy)*

<sup>c</sup>*Department of Environmental and Prevention Sciences, University of Ferrara, Via L. Borsari, 46, 44121 Ferrara (Italy)*

<sup>d</sup>*Institute of Organic Synthesis and Photoreactivity - Italian National Research Council, Via P. Gobetti, 101, 40129 Bologna (Italy)*

[daniele.ragno@unife.it](mailto:daniele.ragno@unife.it); [alessandro.massi@unife.it](mailto:alessandro.massi@unife.it)

## Electronic supplementary information

### Table of content:

|                                                                                                                                                                              |     |
|------------------------------------------------------------------------------------------------------------------------------------------------------------------------------|-----|
| Proposed mechanism for the synthesis of <b>c(HMF)<sub>n</sub></b> by NHC oxidative catalysis                                                                                 | S3  |
| Extended optimization study of the NHC-catalyzed synthesis of <b>c(HMF)<sub>n</sub></b>                                                                                      | S3  |
| <sup>1</sup> H and <sup>13</sup> C NMR of <b>c(HMF)<sub>n</sub></b> , model <b>PHMF<sub>E6</sub></b> and 2D <sup>1</sup> H- <sup>13</sup> C HMQC of <b>PHMF<sub>E6</sub></b> | S4  |
| ESI-MS of <b>c(HMF)<sub>n</sub></b> with peak assignments                                                                                                                    | S7  |
| HPLC chromatograms of <b>c(HMF)<sub>n</sub></b>                                                                                                                              | S8  |
| GPC chromatograms of <b>PHMF</b> and <b>c(HMF)<sub>n</sub></b>                                                                                                               | S10 |
| TGA of <b>c(HMF)<sub>n</sub></b> and <b>PHMF<sub>E5</sub></b>                                                                                                                | S15 |
| DSC of <b>PHMF<sub>E5</sub></b> after heating cycle and solubilization in HFIP                                                                                               | S16 |
| Picture of <b>PHMF<sub>E5</sub></b>                                                                                                                                          | S16 |
| XRD of <b>PHMF<sub>E5</sub></b> after solubilization in HFIP and subsequent drying                                                                                           | S17 |

## Proposed mechanism for the synthesis of $c(\text{HMF})_n$ by NHC oxidative catalysis

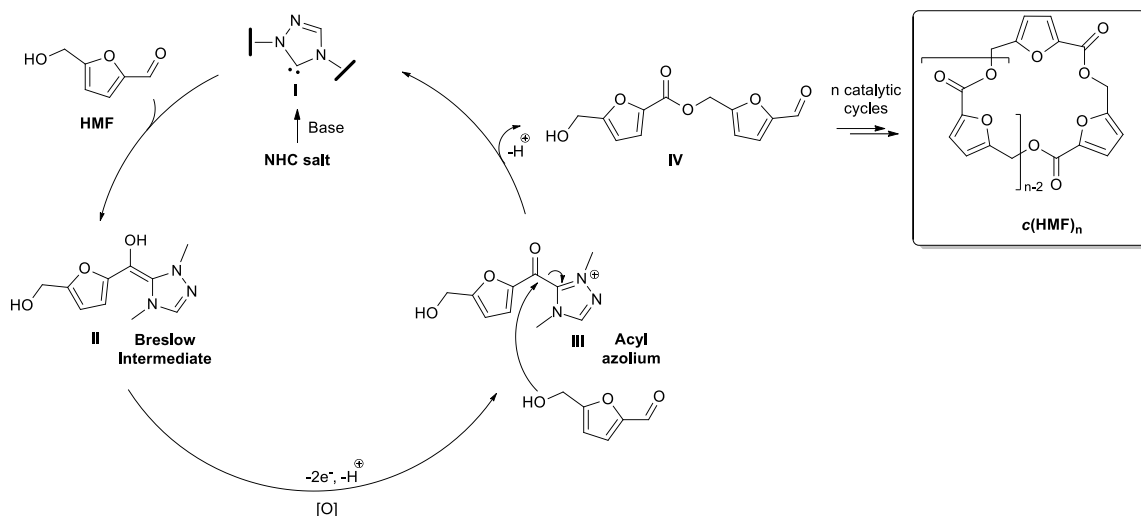

**Table S1.** Extended optimization study of the NHC-catalyzed synthesis of  $c(\text{HMF})_n$ .<sup>a</sup>

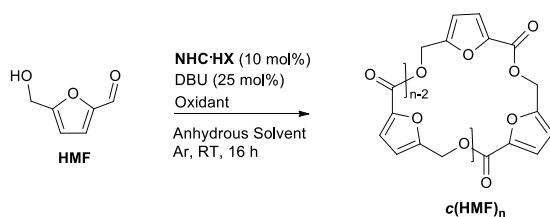

| Entry          | NHCHX    | Oxidant (mol%) | Solvent | Conv. (%) <sup>b</sup> | $c(\text{HMF})_n$ (%) <sup>c</sup> |
|----------------|----------|----------------|---------|------------------------|------------------------------------|
| 1              | <b>C</b> | <b>2</b> (100) | THF     | 10                     | -                                  |
| 2              | <b>D</b> | <b>2</b> (100) | THF     | -                      | -                                  |
| 3 <sup>d</sup> | <b>A</b> | <b>2</b> (100) | THF     | 62                     | 43                                 |
| 4 <sup>e</sup> | <b>A</b> | <b>2</b> (100) | THF     | 73                     | 51                                 |
| 5              | <b>A</b> | <b>2</b> (100) | Toluene | 78                     | 46                                 |

<sup>a</sup>HMF (1.60 mmol), anhydrous solvent (120 mL). <sup>b</sup>Detected by <sup>1</sup>H NMR analysis of the crude reaction mixture (durene as internal standard). <sup>c</sup>Isolated yield. <sup>d</sup>Reaction time: 8 h. <sup>e</sup>**A** (5 mol%), DBU (15 mol%).

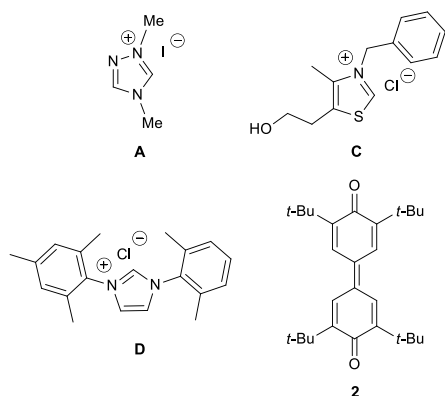

**$^1\text{H}$  (300 MHz) and  $^{13}\text{C}$  (101 MHz) spectra ( $\text{CDCl}_3$ ) of  $c(\text{HMF})_n$  synthesized from HMFCFA**

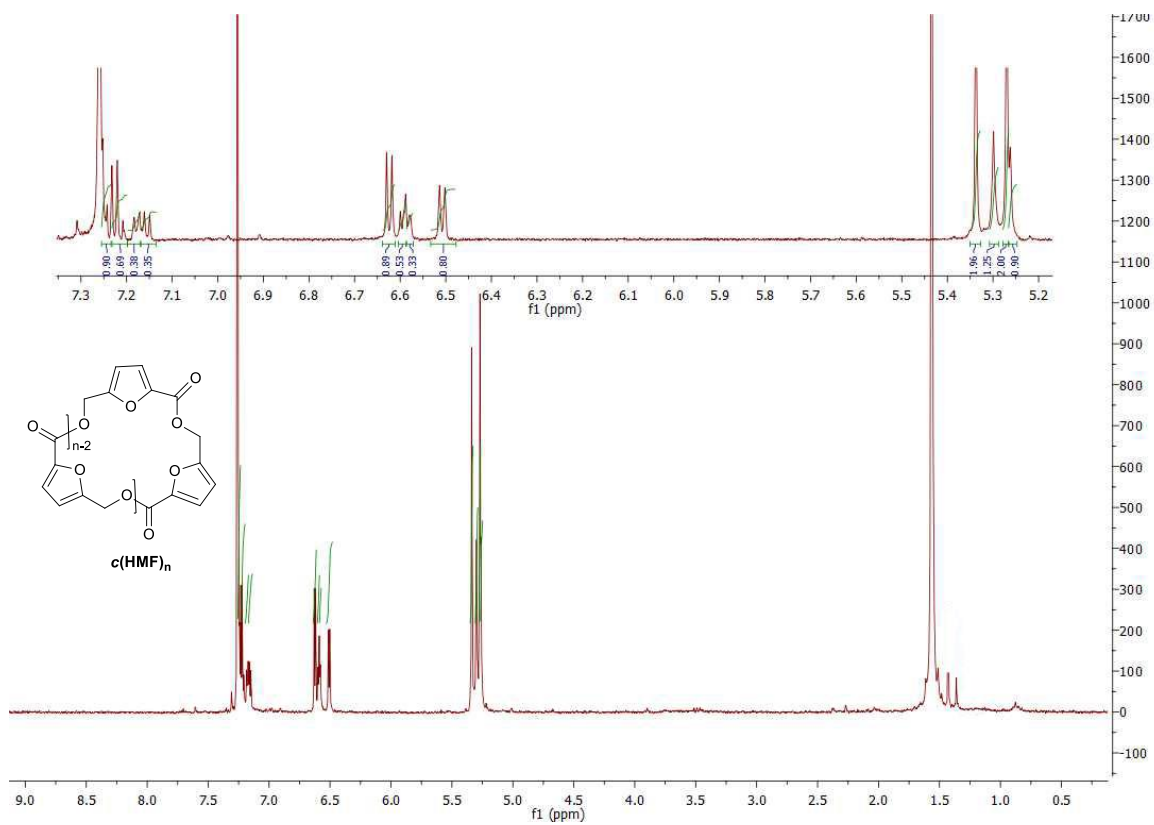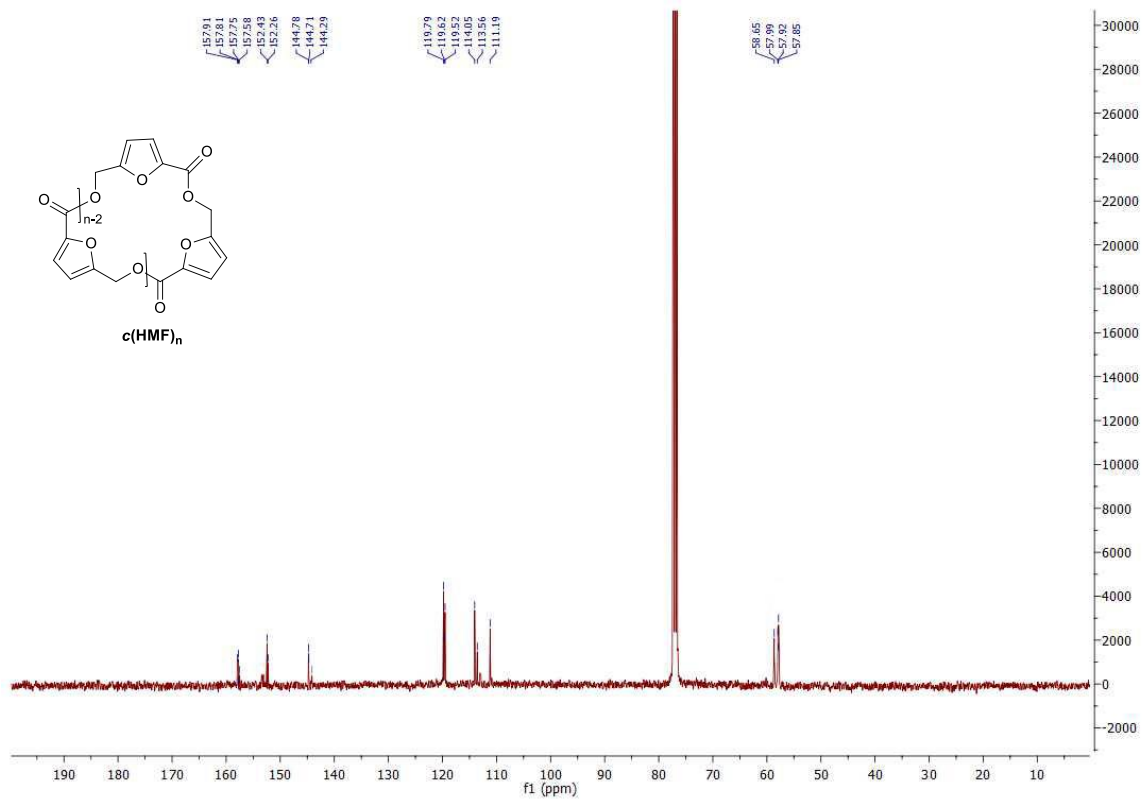

**$^1\text{H}$  (300 MHz) and  $^{13}\text{C}$  (101 MHz) spectra ( $\text{CDCl}_3$ ) of  $c(\text{HMF})_n$  synthesized from HMF**

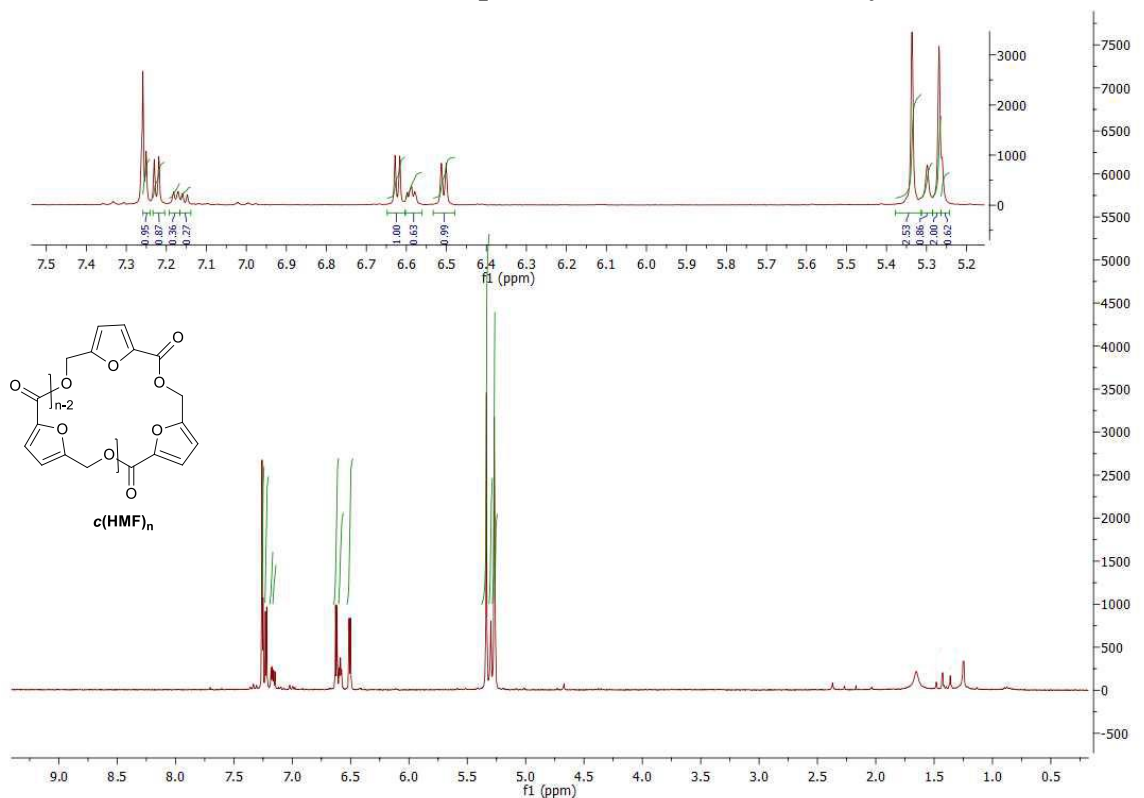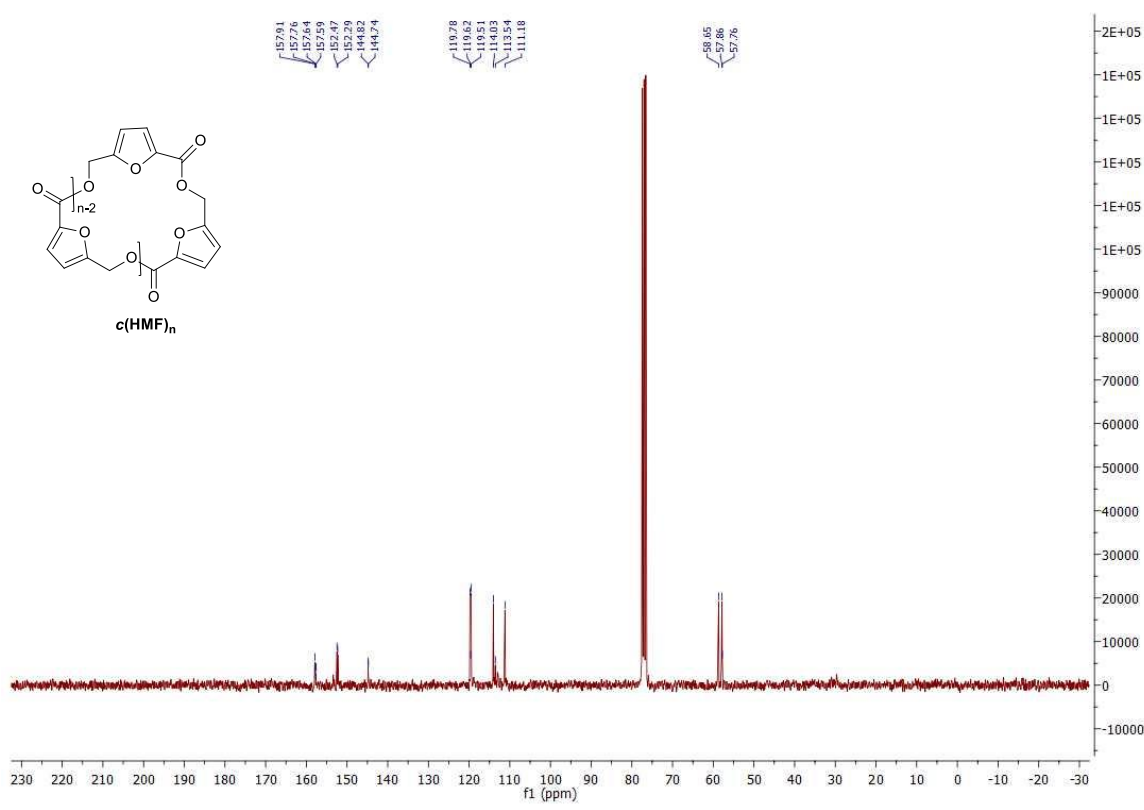

**$^1\text{H}$  (300 MHz) and  $^{13}\text{C}$  (101 MHz) spectra ( $\text{CDCl}_3$ : TFA = 1:1) of model PHMF $_E6$**

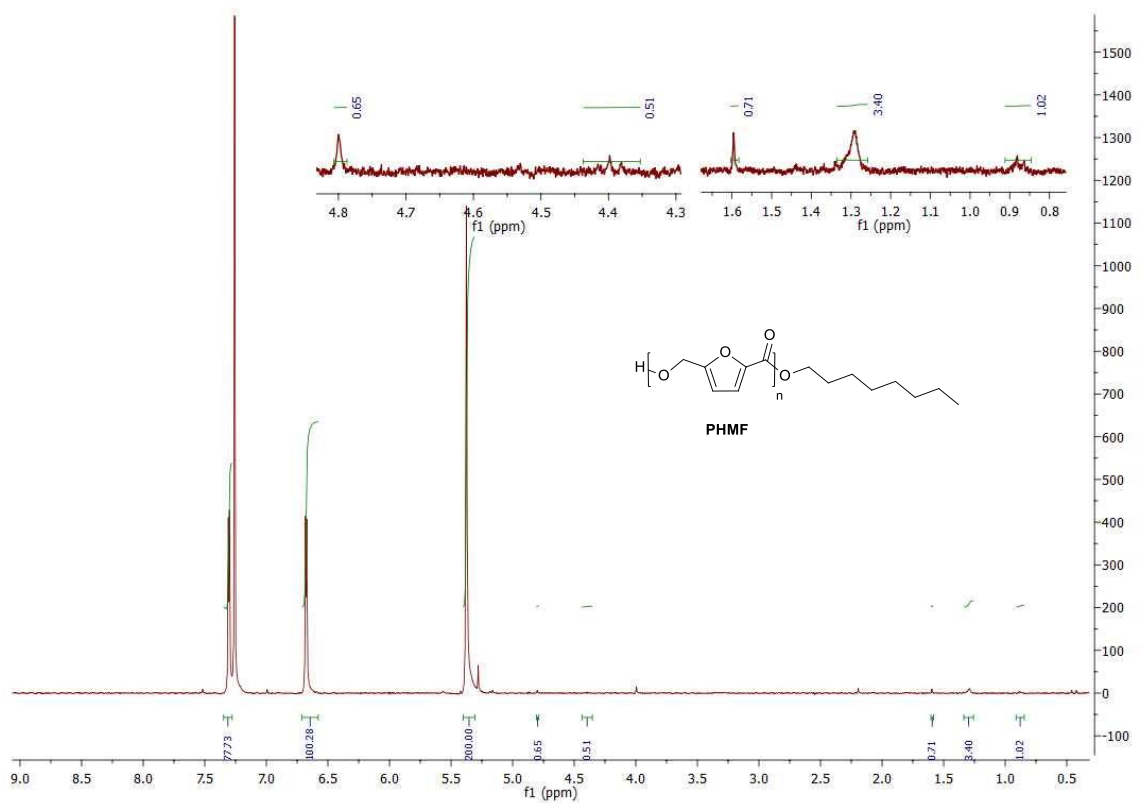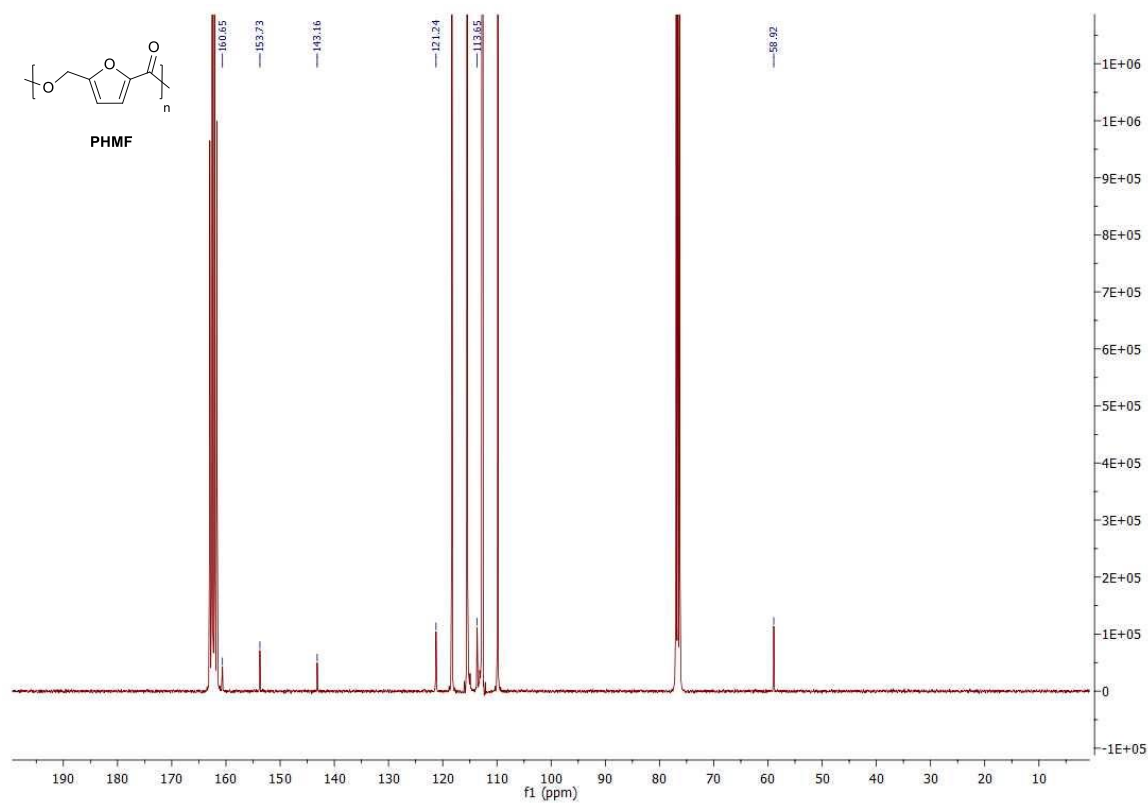

## 2D $^1\text{H}$ - $^{13}\text{C}$ HMQC correlation spectroscopy ( $\text{CDCl}_3$ : TFA = 1:1) of model PHMF $_{\text{E}6}$

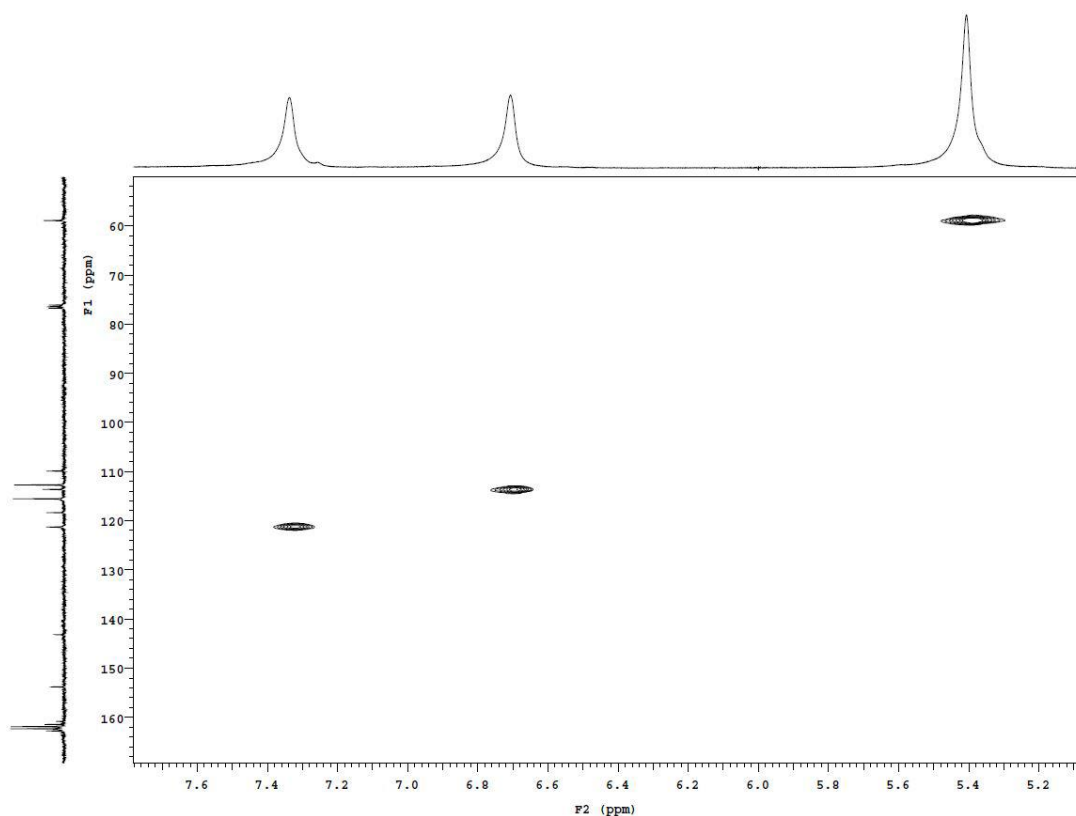

## ESI-MS of $c(\text{HMF})_n$ with peak assignments

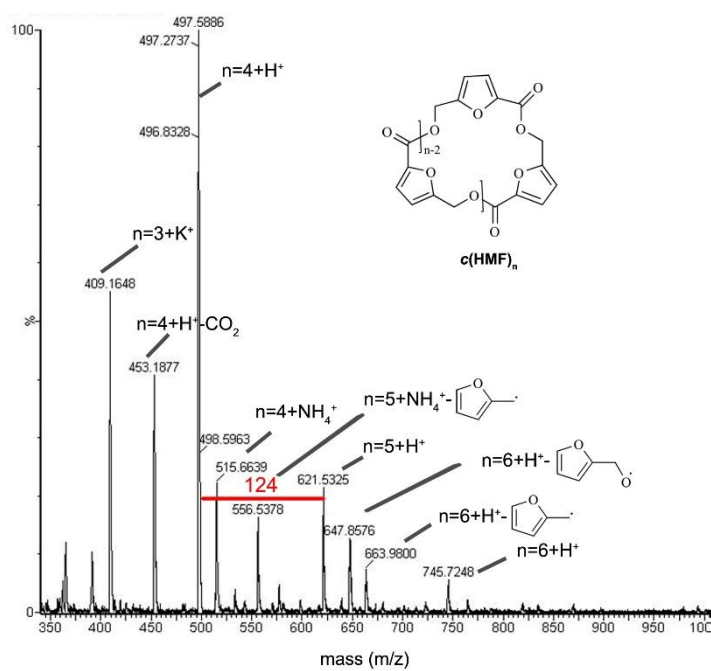

### HPLC chromatogram of $c(\text{HMF})_n$ synthesized from HMFCA

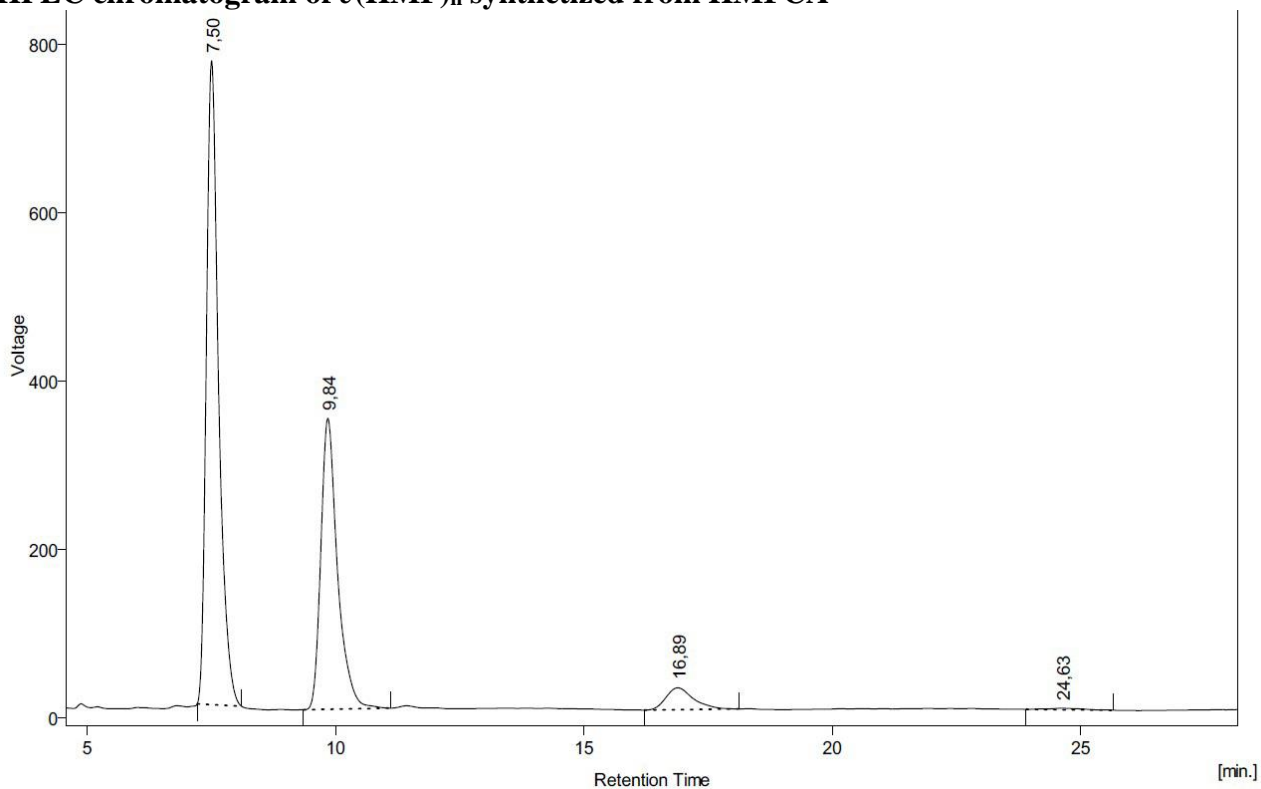

HPLC chromatogram. Prep Nova-Pak HR SILICA column (60 Å, 6 μm, 3.9 x 300 mm), *n*-hexane/dioxane 70/30 (v/v), 1.0 mL/min, 254 nm.  $n=3$ ,  $t_r = 9.84$  min;  $n=4$ ,  $t_r = 7.50$  min;  $n=5$ ,  $t_r = 16.89$  min;  $n=6$ ,  $t_r = 24.63$  min.



## HPLC chromatogram of $c(\text{HMF})_n$ synthesized from HMF

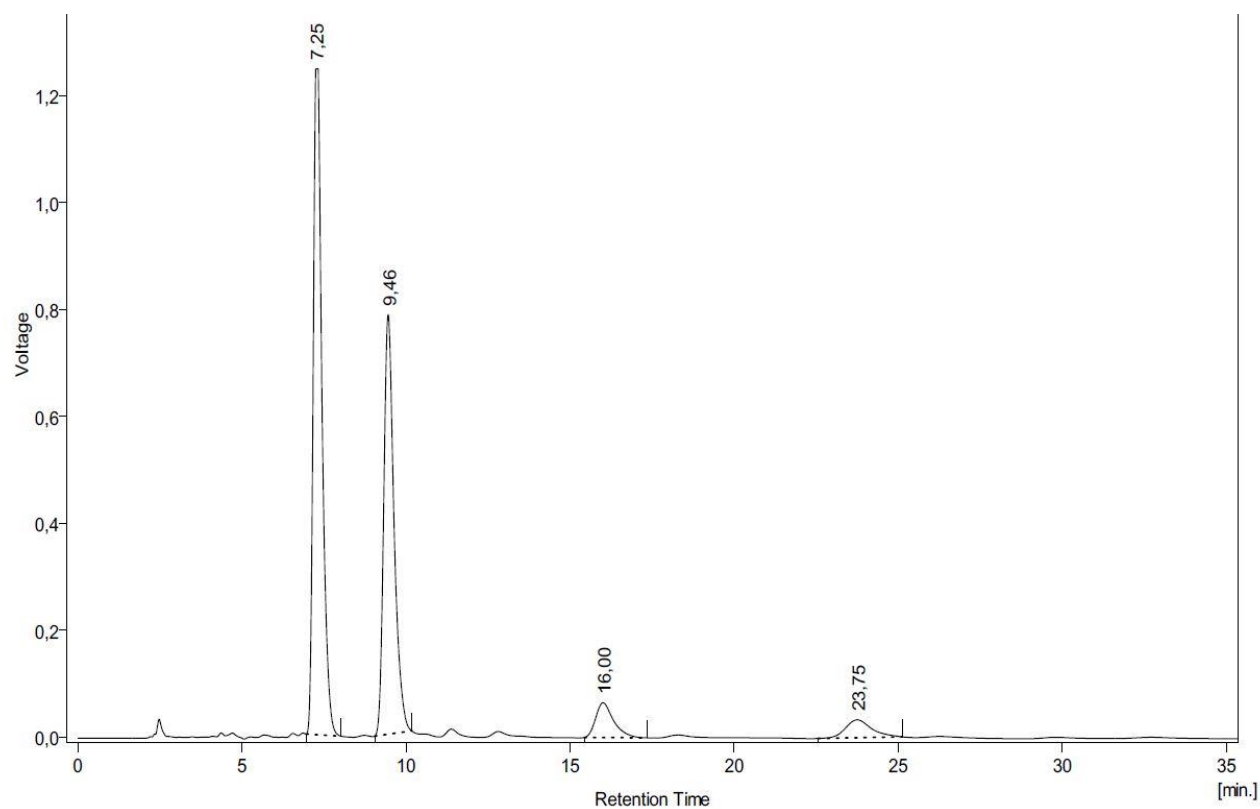

HPLC chromatogram. Prep Nova-Pak HR SILICA column (60 Å, 6 μm, 3.9 x 300 mm), *n*-hexane/dioxane 70/30 (v/v), 1.0 mL/min, 254 nm. *n* = 3,  $t_r$  = 9.46 min; *n* = 4,  $t_r$  = 7.25 min; *n* = 5,  $t_r$  = 16.00 min; *n* = 6,  $t_r$  = 23.75 min.

# GPC chromatograms of PHMF

## PHMF<sub>E1</sub>

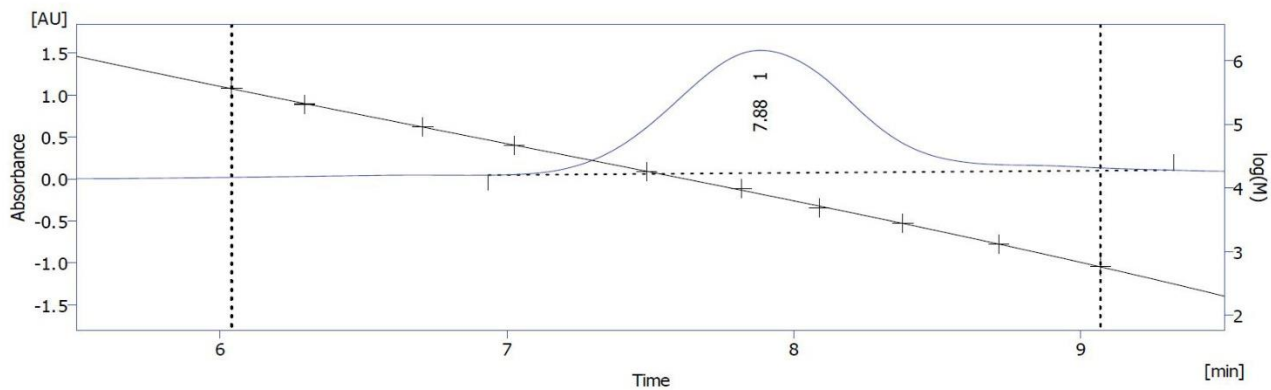

Equation:  $Y = -0.01168 \cdot X^3 + 0.24637 \cdot X^2 - 2.61818 \cdot X + 14.957$   
 Correlation Factor: 0.9998978

|   | Max. RT | Start RT | End RT | Mp   | Mn   | Mw   | PD     | Area [mAU.s] | Area [%] |
|---|---------|----------|--------|------|------|------|--------|--------------|----------|
| 1 | 7.88    | 6.93     | 9.32   | 8034 | 5608 | 9116 | 1.6255 | 65536.59     | 100.00   |

## PHMF<sub>E2</sub>

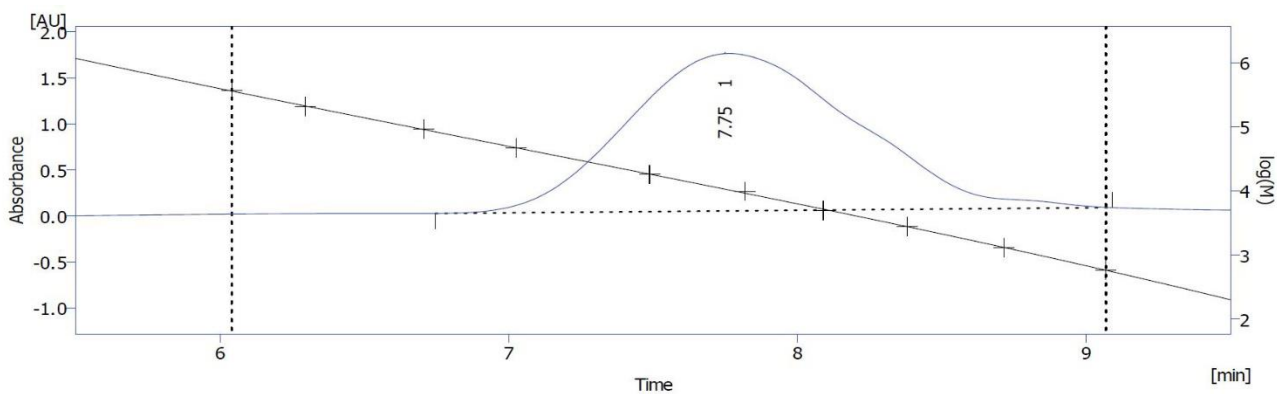

Equation:  $Y = -0.01168 \cdot X^3 + 0.24637 \cdot X^2 - 2.61818 \cdot X + 14.957$   
 Correlation Factor: 0.9998978

|   | Max. RT | Start RT | End RT | Mp    | Mn   | Mw    | PD     | Area [mAU.s] | Area [%] |
|---|---------|----------|--------|-------|------|-------|--------|--------------|----------|
| 1 | 7.75    | 6.75     | 9.09   | 10618 | 6576 | 11494 | 1.7479 | 93479.16     | 100.00   |

**PHMF<sub>E3</sub>**

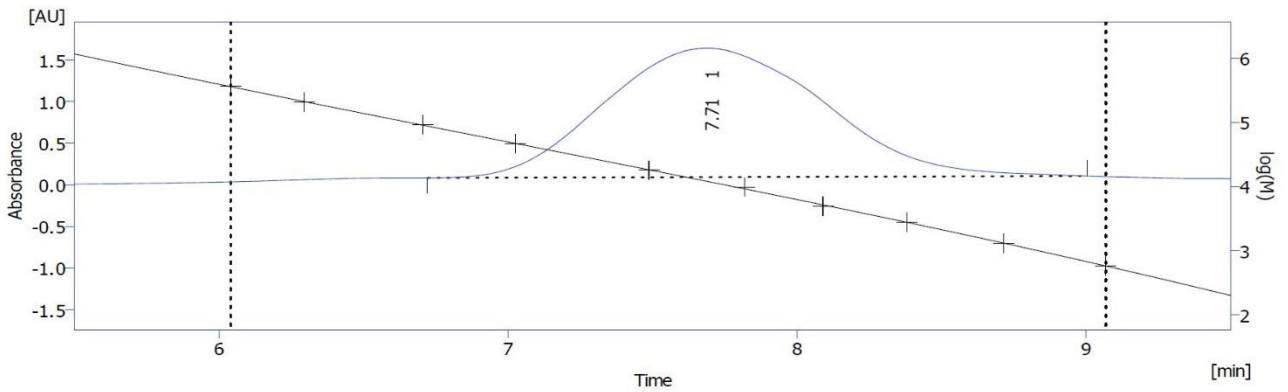

Equation:  $Y = -0.01168 \cdot X^3 + 0.24637 \cdot X^2 - 2.61818 \cdot X + 14.957$   
 Correlation Factor: 0.9998978

|   | Max. RT | Start RT | End RT | Mp    | Mn   | Mw    | PD     | Area [mAU.s] | Area [%] |
|---|---------|----------|--------|-------|------|-------|--------|--------------|----------|
| 1 | 7.71    | 6.72     | 9.00   | 11600 | 8414 | 13734 | 1.6324 | 80976.62     | 100.00   |

**PHMF<sub>E4</sub>**

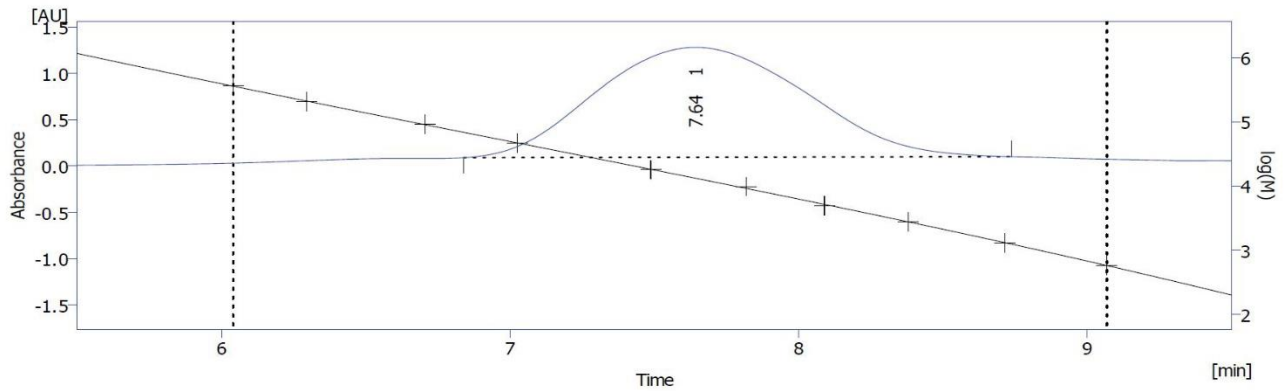

Equation:  $Y = -0.01168 \cdot X^3 + 0.24637 \cdot X^2 - 2.61818 \cdot X + 14.957$   
 Correlation Factor: 0.9998978

|   | Max. RT | Start RT | End RT | Mp    | Mn   | Mw    | PD     | Area [mAU.s] | Area [%] |
|---|---------|----------|--------|-------|------|-------|--------|--------------|----------|
| 1 | 7.64    | 6.84     | 8.74   | 13207 | 9941 | 15020 | 1.5108 | 59394.51     | 100.00   |

**PHMF<sub>E5</sub>**

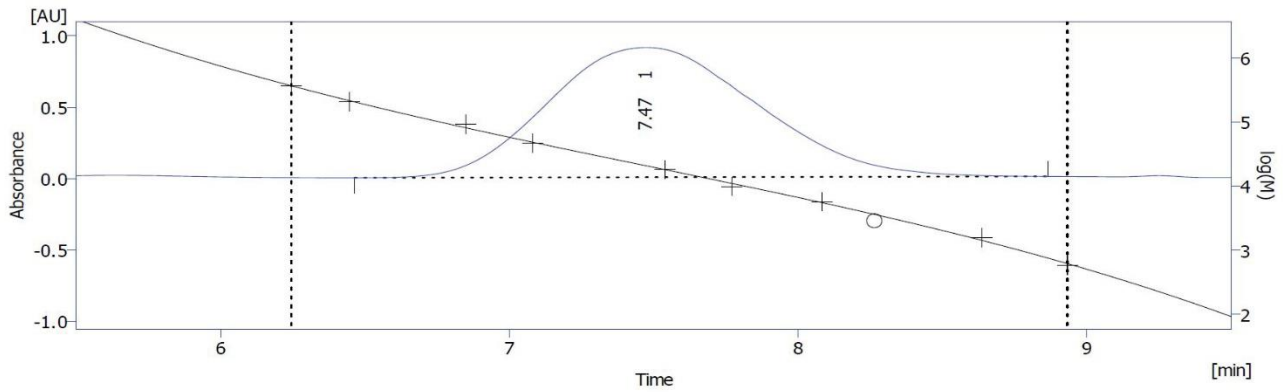

Equation:  $Y = -0.05872 \cdot X^3 + 1.31866 \cdot X^2 - 10.79522 \cdot X + 35.85374$   
 Correlation Factor: 0.9994252

|   | Max. RT | Start RT | End RT | Mp    | Mn    | Mw    | PD     | Area [mAU.s] | Area [%] |
|---|---------|----------|--------|-------|-------|-------|--------|--------------|----------|
| 1 | 7.47    | 6.46     | 8.87   | 20846 | 14403 | 23360 | 1.6219 | 45662.46     | 100.00   |

**PHMF<sub>E5</sub>(NHC)**

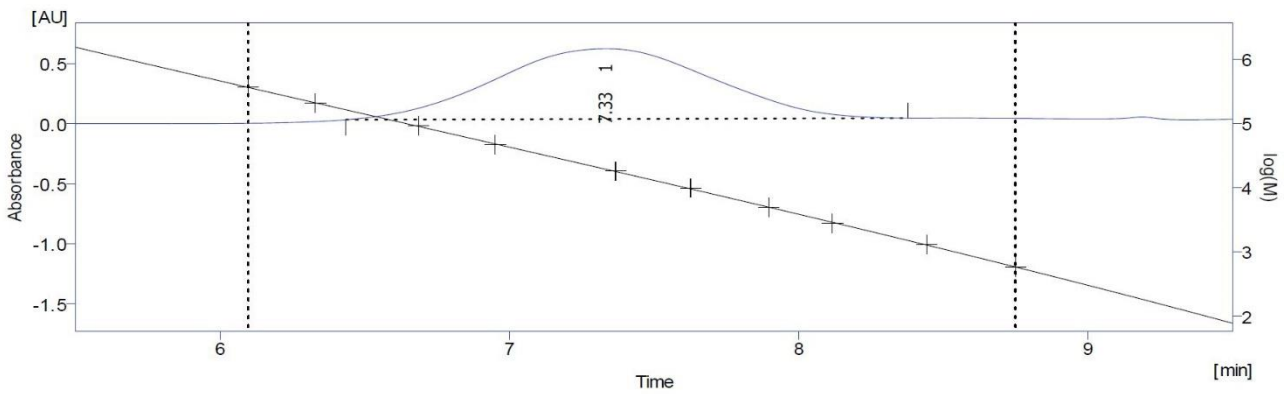

Equation:  $Y = -0.00786 \cdot X^3 + 0.15792 \cdot X^2 - 2.08513 \cdot X + 14.18193$   
 Correlation Factor: 0.9999535

|   | Max. RT | Start RT | End RT | Flow Rate Correction | Mp    | Mn    | Mw    | PD     | Area [mAU.s] | Area [%] |
|---|---------|----------|--------|----------------------|-------|-------|-------|--------|--------------|----------|
| 1 | 7.33    | 6.43     | 8.38   | 1.0000               | 19346 | 14275 | 25772 | 1.8053 | 30389.66     | 100.00   |

**PHMF<sub>E6</sub>**

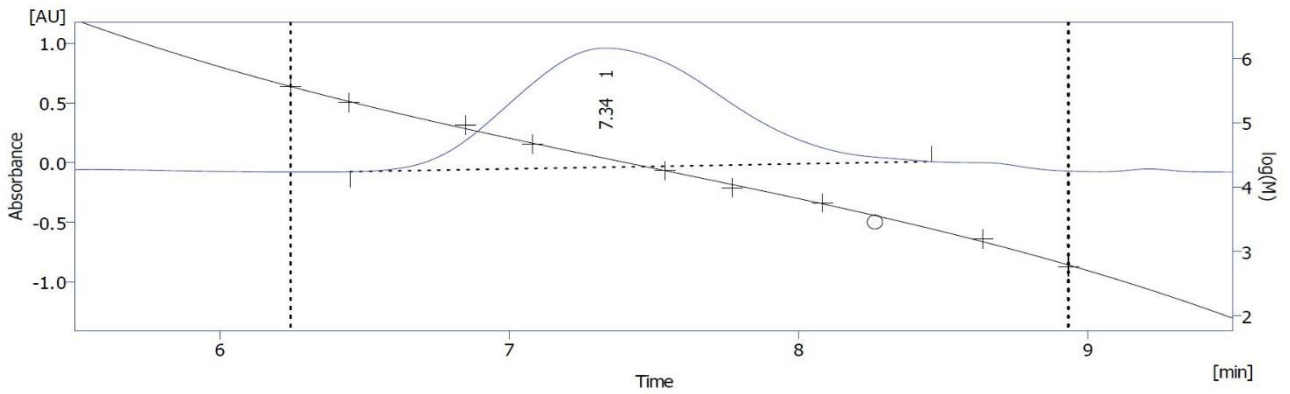

Equation:  $Y = -0.05872 \cdot X^3 + 1.31866 \cdot X^2 - 10.79522 \cdot X + 35.85374$   
 Correlation Factor: 0.9994252

|   | Max. RT | Start RT | End RT | Mp    | Mn    | Mw    | PD     | Area [mAU.s] | Area [%] |
|---|---------|----------|--------|-------|-------|-------|--------|--------------|----------|
| 1 | 7.34    | 6.45     | 8.46   | 27799 | 18746 | 29825 | 1.5910 | 49917.10     | 100.00   |

**PHMF<sub>E7</sub>**

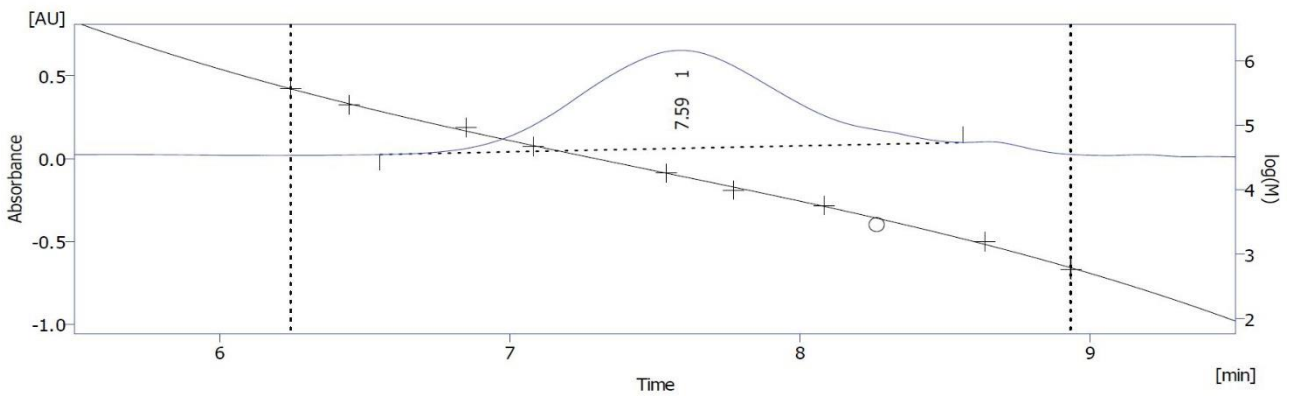

Equation:  $Y = -0.05872 \cdot X^3 + 1.31866 \cdot X^2 - 10.79522 \cdot X + 35.85374$   
 Correlation Factor: 0.9994252

|   | Max. RT | Start RT | End RT | Mp    | Mn    | Mw    | PD     | Area [mAU.s] | Area [%] |
|---|---------|----------|--------|-------|-------|-------|--------|--------------|----------|
| 1 | 7.59    | 6.55     | 8.56   | 16058 | 12492 | 19560 | 1.5659 | 28168.48     | 100.00   |

**PHMF<sub>E8</sub>**

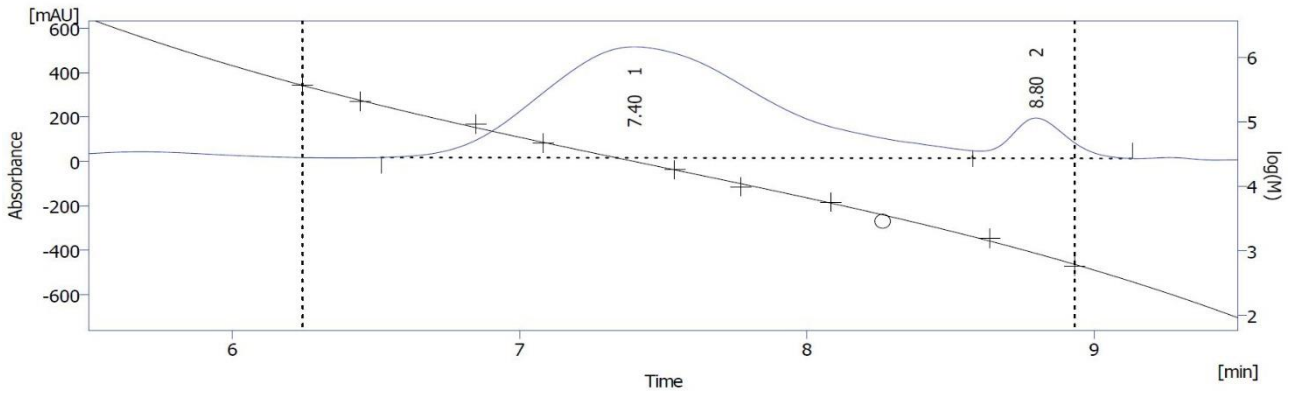

Equation:  $Y = -0.05872 \cdot X^3 + 1.31866 \cdot X^2 - 10.79522 \cdot X + 35.85374$   
 Correlation Factor: 0.9994252

|   | Max. RT | Start RT | End RT | Mp    | Mn    | Mw    | PD     | Area [mAU.s] | Area [%] |
|---|---------|----------|--------|-------|-------|-------|--------|--------------|----------|
| 1 | 7.40    | 6.52     | 8.58   | 24155 | 13192 | 24732 | 1.8748 | 27363.35     | 91.56    |
| 2 | 8.80    | 8.58     | 9.13   | 908   | 858   | 925   | 1.0775 | 2521.55      | 8.44     |

**c(HMF)<sub>n</sub>**

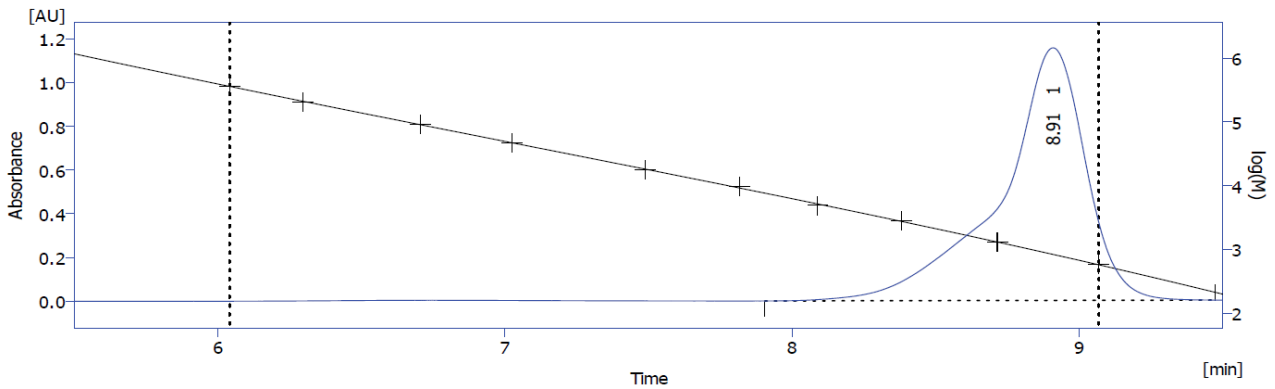

Result Table (cal20201022\_mix - Narrow - DS37dildilbis-29\_10\_2020\_15\_18\_42 - UVD2.1L: UV\_signal)  
 Equation:  $Y = -0.01168 \cdot X^3 + 0.24637 \cdot X^2 - 2.61818 \cdot X + 14.957$   
 Correlation Factor: 0.9998978

|   | Max. RT | Start RT | End RT | Mp  | Mn  | Mw   | PD     | Area [mAU.s] | Area [%] |
|---|---------|----------|--------|-----|-----|------|--------|--------------|----------|
| 1 | 8.91    | 7.91     | 9.47   | 838 | 927 | 1117 | 1.2055 | 23758.15     | 100.00   |

**TGA of  $c(\text{HMF})_n$  in nitrogen atmosphere at  $10^\circ\text{C}/\text{min}$  as scan rate**

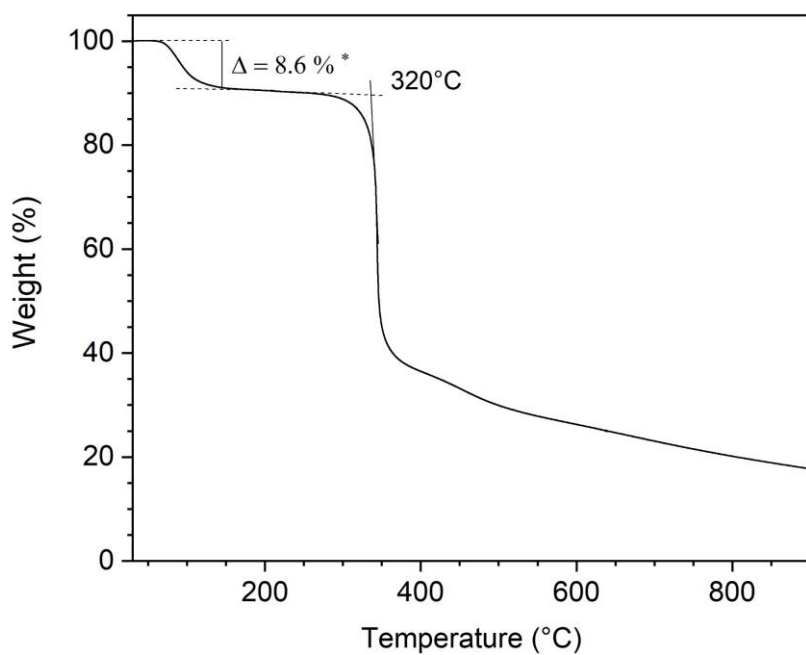

\*residual Heptane/EtOAc

**TGA of  $\text{PHMF}_{E5}$  in nitrogen atmosphere at  $10^\circ\text{C}/\text{min}$  as scan rate**

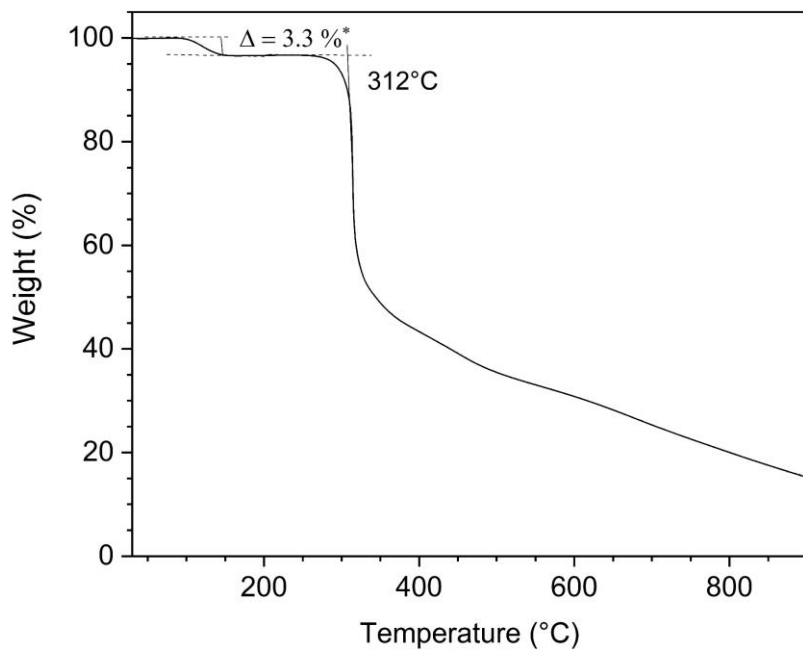

\*residual EtOAc

**DSC of PHMF<sub>E5</sub> previously analyzed by DSC up to 220°C, solubilized with HFIP, dried and analyzed again in nitrogen atmosphere at 10°C/min as scan rate**

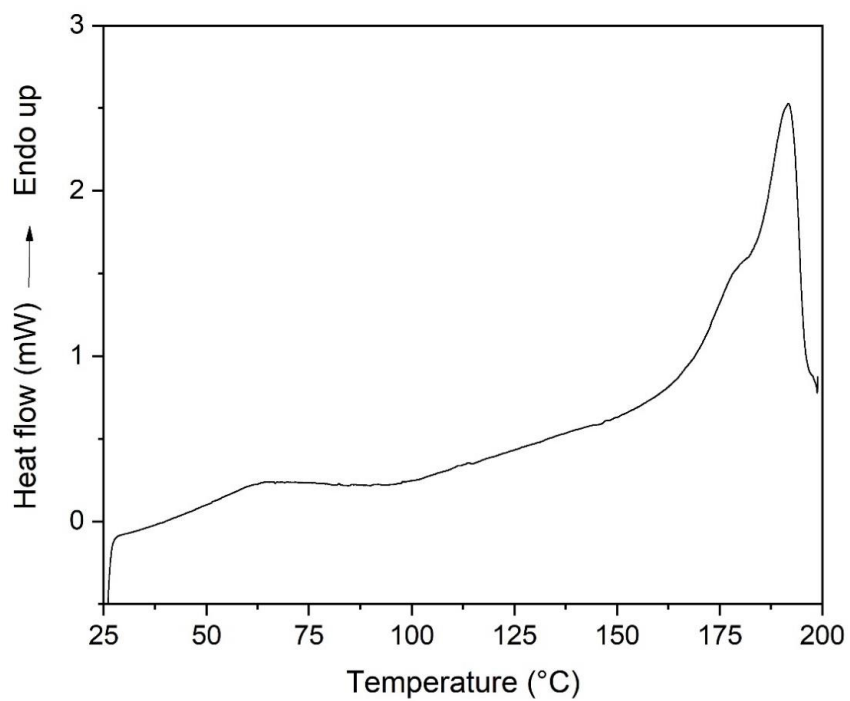

**Picture of PHMF<sub>E5</sub>**

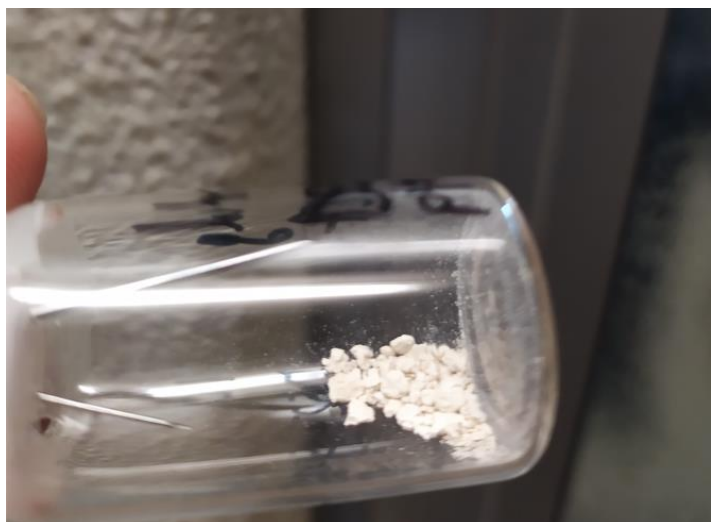



# XRD of PHMF<sub>E5</sub> after solubilization in HFIP and subsequent drying

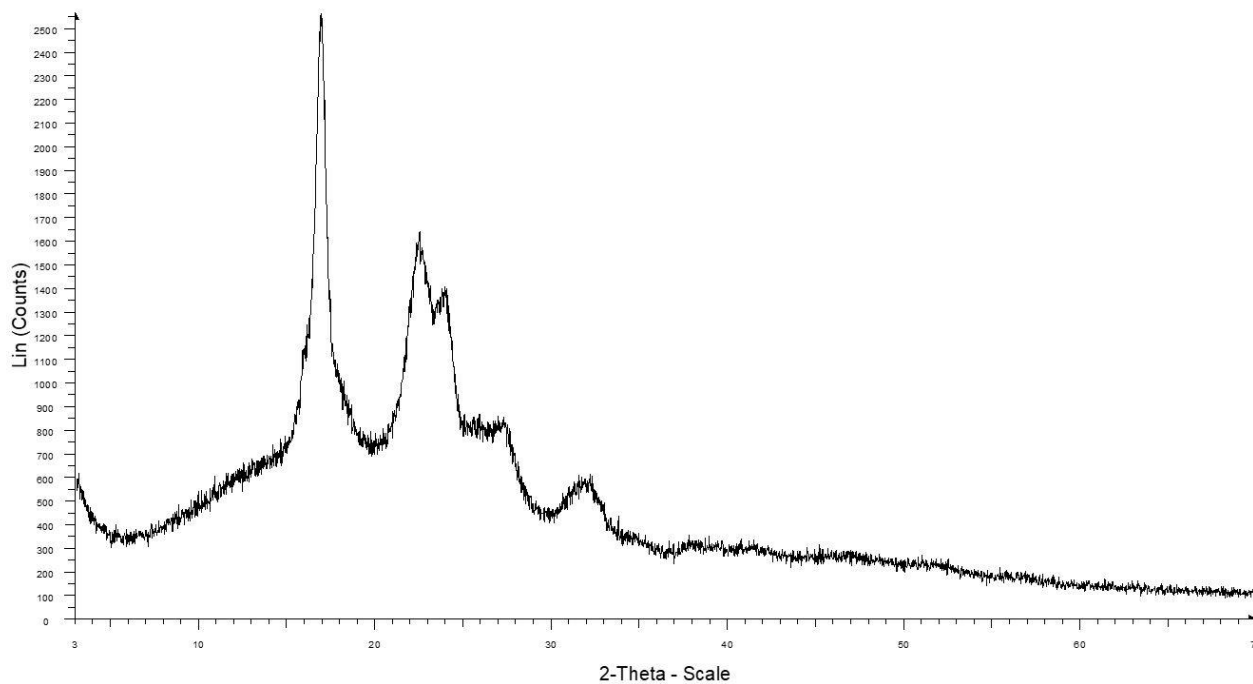

Supplement: d1py01687c1.pdf [file d1py01687c1.pdf]
